1 **Insights into COVID-19 epidemiology and control from temporal changes**  
2 **in serial interval distributions in Hong Kong**

3  
4 Sheikh Taslim Ali<sup>1,2,†</sup>, Dongxuan Chen<sup>1,2,†</sup>, Wey Wen Lim<sup>1,2</sup>, Amy Yeung<sup>1,2</sup>, Dillon C.  
5 Adam<sup>1,2</sup>, Yiu Chung Lau<sup>1,2</sup>, Eric H. Y. Lau<sup>1,2</sup>, Jessica Y. Wong<sup>1</sup>, Jingyi Xiao<sup>1</sup>, Faith Ho<sup>1</sup>,  
6 Huizhi Gao<sup>1</sup>, Lin Wang<sup>3</sup>, Xiao-Ke Xu<sup>4</sup>, Zhanwei Du<sup>1,2</sup>, Peng Wu<sup>1,2</sup>, Gabriel M. Leung<sup>1,2,‡</sup>,  
7 Benjamin J. Cowling<sup>1,2,‡</sup>

8  
9 **Affiliations:**

10 <sup>1</sup> WHO Collaborating Centre for Infectious Disease Epidemiology and Control, School of  
11 Public Health, Li Ka Shing Faculty of Medicine, The University of Hong Kong, Hong Kong  
12 Special Administrative Region, China

13 <sup>2</sup> Laboratory of Data Discovery for Health Limited, Hong Kong Science and Technology Park,  
14 New Territories, Hong Kong.

15 <sup>3</sup> Department of Genetics, University of Cambridge, Cambridge, United Kingdom,

16 <sup>4</sup> College of Information and Communication Engineering, Dalian Minzu University, Dalian  
17 116600, China.

18  
19 †These authors contributed equally to this work.

20 ‡Joint senior authors

21  
22 Corresponding author: [bcowling@hku.hk](mailto:bcowling@hku.hk)

23

24

25

26

27

28

29

30

31

32

**NOTE: This preprint reports new research that has not been certified by peer review and should not be used to guide clinical practice.**

33

34 **Abstract:**

35

36 The serial interval distribution is used to approximate the generation time distribution, an  
37 essential parameter to predict the effective reproductive number “ $R_t$ ”, a measure of  
38 transmissibility. However, serial interval distributions may change as an epidemic progresses  
39 rather than remaining constant. Here we show that serial intervals in Hong Kong varied over  
40 time, closely associated with the temporal variation in COVID-19 case profiles and public  
41 health and social measures that were implemented in response to surges in community  
42 transmission. Quantification of the variation over time in serial intervals led to improved  
43 estimation of  $R_t$ , and provided additional insights into the impact of public health measures on  
44 transmission of infections.

45

46

47 **One-Sentence Summary:**

48

49 Real-time estimates of serial interval distributions can improve assessment of COVID-19  
50 transmission dynamics and control.

51 **Main Text:**

52 Monitoring the intensity of coronavirus disease 2019 (COVID-19) transmission is an essential  
53 component of public health surveillance for situational awareness and real-time impact  
54 assessment of interventions (1, 2). Transmissibility has typically been measured by the  
55 effective reproductive number “ $R_t$ ” based on analysis of epidemic curves along with an  
56 estimate of the generation time distribution (3-5). The generation time for an infectious disease  
57 describes the average time between consecutive infections in a transmission chain (4, 6), and  
58 is often approximated by the serial interval distribution which describes the average time  
59 between illness onsets of consecutive cases in a transmission chain (3, 7, 8). However, we and  
60 others have shown that the serial interval distribution may change as an epidemic progresses  
61 rather than remaining constant (9-11).

62

63 In Hong Kong, a subtropical city located on the southern coast of China, the public health  
64 responses to COVID-19 following a “dynamic zero covid” strategy aiming to eliminate local  
65 infections included a number of key components. First, travel restrictions and on-arrival  
66 quarantines on all in-bound travellers have been implemented throughout the pandemic to  
67 reduce the importation risk. Second, a series of targeted and community-wide public health and  
68 social measures have been used to minimize local transmission of COVID-19, including  
69 hospital isolation of all confirmed cases, quarantine of close contacts in designated facilities,  
70 mask mandate, restriction on gatherings, closures of facilities, schools, and some workplaces,  
71 and compulsory testing orders for persons at a higher risk of exposure. This strategy was  
72 successful in limiting cumulative incidence to 12,600 confirmed cases by 31 December 2021,  
73 corresponding to 0.16% of the total population in Hong Kong. All community epidemics were  
74 associated with ancestral-like viruses and not variants. Here, our objective is to take advantage  
75 of detailed contact tracing data in Hong Kong to characterise temporal changes within and

76 between waves in the serial interval distribution of COVID-19 through a series of community  
77 epidemics, and identify possible factors associated with those temporal changes.

78

79

## 80 **COVID-19 transmission and PHSMs in Hong Kong**

81 We obtained detailed information on each laboratory-confirmed case of COVID-19 from the  
82 Department of Health of the Hong Kong SAR government (section 1, supplementary  
83 materials). The database included information on the confirmation date, illness onset date,  
84 isolation date, hospital admission date, outcome (critical/serious/stable), infection origin  
85 (locally infected vs infected outside Hong Kong) and arrival date (if applicable), home and  
86 workplace location, detailed travel/movement history, cluster information from contact tracing  
87 (if applicable) of each confirmed case (12). In Hong Kong from 22 January 2020 through 31  
88 July 2022, COVID-19 has caused five local epidemic waves. The “first wave”, defined as the  
89 period from late January to mid-February 2020 with a small number of community cases linked  
90 to importations from mainland China (13). Given the very small number of imported infections  
91 (n=45) we excluded the first wave from our study. We analysed data from throughout the  
92 second wave (1 March 2020 – 10 April 2020), third wave (25 June 2020 – 8 September 2020)  
93 and fourth wave (1 Nov 2020 – 23 March 2021) (**Fig. 1A**). In the fifth wave which started in  
94 early January 2022 (14), contact tracing capacity was challenged due to the fast exponential  
95 rise in cases, and we were only able to include detailed data on confirmed transmission pairs  
96 from the very early stage of this wave in these analyses. Our study received ethical approval  
97 from the Institutional Review Board of the University of Hong Kong (ref: UW 20-341).

98

99 We collected information from official reports on the public health and social measures  
100 (PHSMs) implemented in Hong Kong to control the spread of COVID-19 (15). We further

101 classified these interventions into case-based, community-wide (including travel-based)  
102 control measures (16). The case-based measures including strict isolation of cases and  
103 quarantine of close contacts were maintained throughout each wave while the community-wide  
104 measures were generally only implemented when needed to bring each epidemic wave under  
105 control. The summary of these PHSMs including their timing and duration is provided in  
106 Supplementary table S1.

107

### 108 **Construction of transmission pairs**

109 Following our earlier work (17), we first reconstructed the initial transmission pairs with  
110 reference to the detailed individual data on all confirmed cases retrieved from the Centre for  
111 Health Protection. We further rechecked the initially constructed pairs by their cluster  
112 information and epidemiological linkage with other cases and determined the infector and  
113 infectee within a pair according to a pre-defined algorithm (section 1, supplementary  
114 materials). The larger clusters with complex epidemiological linkages between the cases were  
115 individually assessed to determine the infector and the infectee in each transmission pair. If  
116 there were two or more likely infectors in one cluster, we defined the infector as the case with  
117 the earliest onset date. If cases shared the same onset date, the one with an earlier report date  
118 or case number would be classified as an infector (section 1, supplementary materials) (9, 18).  
119 We also performed a possible cross-check on unclear pairs with phylogenetic data to examine  
120 potential infector-infectee relationships with the *Phybreak* package in R (19). We resolved the  
121 multiple infector issue by identifying a case to be the infector of all subsequent cases with an  
122 immediate link in a cluster when the onset intervals between the infector and the infectees fell  
123 within a pre-defined time period, 8 days for the main analysis and 5-14 days for the sensitivity  
124 analyses (section 6, supplementary materials). Among more than 12,600 COVID-19 cases in  
125 Hong Kong in the period 1 March 2020 through to 23 March 2021, most were identified in the

126 third and fourth waves (**Fig. 1A**), in total we were able to construct 2433 transmission pairs,  
127 including 87, 965 and 1381 in the second, third and fourth waves, respectively. Among these,  
128 we considered 47, 357 and 355 transmission pairs as “confirmed pairs” in these three waves,  
129 respectively, and the remainder were “likely pairs” (section 1, supplementary materials). There  
130 were an additional 64 pairs identified in small outbreaks occurred between our pre-defined  
131 waves, and 229 pairs (30 for BA1, 174 for BA2 and 25 for delta) identified in the very early  
132 stage of the fifth wave (fig. S1).

133

### 134 **Time-varying serial intervals and PHSMs**

135 We estimated the serial interval distributions over time in a Bayesian framework based on  
136 Markov Chain Monte Carlo, implemented with the *RStan* package in R (section 2,  
137 supplementary materials). We estimated serial interval distributions for three periods within  
138 each wave i.e. pre-peak, during peak, and post-peak, and then estimated the time-varying daily  
139 effective serial interval distributions with a sliding window of 10 days (7-14 days for sensitivity  
140 analysis) (9). We used the same framework to estimate the distributions of onset-to-isolation  
141 intervals (indicating case isolation delay) for the infectors and then performed multivariable  
142 regression analysis on mean serial intervals where the mean onset-to-isolation interval and  
143 various PHSMs were included as explanatory variables (section 3, supplementary materials).  
144 The variation in population mobility and mixing, potentially reflecting the effect of these  
145 PHSMs, might also impact the transmission dynamics of COVID-19 (20-22). Therefore, we  
146 also performed a multivariable regression analysis on the estimated mean serial intervals with  
147 the daily digital transactions through Octopus cards, a widely-used contactless electronic  
148 payment system in Hong Kong, as the proxy of relative mobility of the population (20), and  
149 daily per capita testing volume (number of PCR tests conducted per 10,000 population per day)  
150 in Hong Kong (section 3, supplementary materials).

151

152 Among the 2497 transmission pairs identified in during the first two years of the COVID-19  
153 pandemic in Hong Kong including the second, third and fourth waves with the ancestral strain  
154 of SARS-CoV-2, the mean serial interval ( $\mu$ ) was estimated to be 3.6 (95% CrI: 3.5, 3.7) days  
155 with standard deviation ( $\sigma$ ) 3.4 (95% CrI: 3.3, 3.5) days.

156

157 We identified the peak of the second wave from 16 to 24 March 2020, from 18 to 27 July 2020  
158 for the third wave, and the fourth wave had two peaks, the first from 30 November 2020 to 15  
159 December 2020 and the second during 11 - 25 January 2021 (section 1, supplementary  
160 materials). There were clear temporal changes in mean serial interval estimates within each  
161 epidemic wave studied and across waves, with mean serial intervals shortening from 5.5 days  
162 (95% CrI: 4.4, 6.6) for pre-peak to 3.2 days (95% CrI: 1.9, 4.4) for post-peak in the second  
163 wave, and from 4.6 (95% CrI: 4.1, 5.0) days to 2.7 (95% CrI: 2.2, 3.2) days in the third wave  
164 (**Fig. 1A** and table S2). However, less clear changes were identified in the fourth wave where  
165 two peaks in incidence were noted (**Fig. 1A**). The standard deviations of serial interval  
166 distributions within individual epidemic waves were more comparable but inter-wave  
167 differences were noticeable ranging from 2.4 days to 4.3 days (table S2). The mean onset-to-  
168 isolation intervals had a similar decreasing temporal pattern along with mean serial intervals  
169 during the second wave shortening from 5.8 days to 3.5 days, while the estimates were largely  
170 constant during the third wave between 5.2 days and 5.4 days and fluctuated throughout the  
171 fourth wave (3.4 days to 5.0 days) (**Fig. 1A** and table S2). In the early part of the fifth wave,  
172 the mean serial interval was estimated to be 3.6 (95% CrI: 3.5, 3.7) days with standard deviation  
173 3.4 (95% CrI: 3.3, 3.5) days with comparable estimates for the Delta variant ( $\mu$ : 4.0 days,  $\sigma$ :  
174 2.4 days), the Omicron BA.1 ( $\mu$ : 3.3 days,  $\sigma$ : 2.0 days) and the Omicron BA.2 ( $\mu$ : 3.6 days,  $\sigma$ :  
175 1.8 days) subvariants.

176

177 The time-varying mean effective serial intervals and onset-to-isolation intervals across the  
178 second, third and fourth epidemic waves in Hong Kong showed similar temporal patterns in  
179 the two epidemiological parameters based on the daily changes in the estimates (**Fig. 1, B to**  
180 **D**). The daily variations (shortening and lengthening) in the estimates of two parameters either  
181 occurred towards the same direction (most of the second wave, some phases of the third and  
182 the fourth waves) or opposite directions (some of the phases in the third wave and the fourth  
183 wave) over the epidemics. Similar results were also indicated in the sensitivity analysis on all  
184 transmission pairs (fig. S2).

185

186 The implemented PHSMs could explain up to 70%, 42% and 49% of the variance in the mean  
187 effective serial intervals estimated for the second, third and fourth waves, respectively (table  
188 S3). The onset-to-isolation interval, reflecting the impact of the targeted measure of case  
189 identification and isolation, was found to have statistically significant positive associations  
190 with the effective serial intervals for the second and third waves with up to 60% and 13% of  
191 the variations explained in the estimated effective serial intervals for the two waves  
192 respectively, but there was not a statistically significant association in the fourth wave. The  
193 interrupted regression further suggested similar associations between onset-to-isolation  
194 intervals and effective serial intervals during different phases of the epidemics (table S4). A  
195 maximum of 10%, 29% and 48% of the variances in the estimated serial intervals were  
196 explained in the three waves respectively by both types of PHSMs (community-wide and case-  
197 based measures) when adjusting for the possible delays in the impact of onset-to-isolation. The  
198 relative population mobility and daily tests per capita showed a positive and a negative  
199 association, respectively, with the mean effective serial interval across the waves (figs. S7 to  
200 S9 and table S5).



201

## 202 **Factor-specific effective serial intervals**

203 We also explored the association between the estimated serial intervals and characteristics of  
204 the infector in the identified transmission pairs in the second, third and fourth wave, including  
205 age, sex, source of infection, transmission setting, severity outcomes and onset-to-isolation  
206 delay (section 4, supplementary materials). The mean serial interval estimates ranged from 2.4  
207 days to 5.6 days across the strata of these characteristic factors for infectors (tables S6 and S7,  
208 and fig. S3). We found that an older age ( $\geq 65$  years) of the infectors was associated with a  
209 higher estimate of the mean serial interval (p-value  $<0.023$ ) across the waves (fig. S3A and  
210 tables S7). The age-specific transmission matrices indicated that a higher proportion of the  
211 secondary infections transmitted to younger ( $<35$  years) infectees from the infectors of all age-  
212 groups (**Fig. 2, A to C**) and initially (during pre-peak) infections started with older ( $>65$  years)  
213 infector-infectee transmissions, then involved more younger population during peak and post-  
214 peak periods of the third and fourth waves (fig. S4). The age specific mean serial intervals were  
215 longer for older infectors (e.g.,  $\geq 65$  years) (**Fig 2, D to F** and fig. S5).

216

217 In the second wave, transmission setting was identified as a statistically significant explanatory  
218 factor (p-value = 0.037) with a higher estimated mean serial interval for household transmission  
219 (tables S6 and S7). In general, the estimates of mean serial intervals were longer for the  
220 transmission pairs with critical/severe infectors across the waves, and was statistically  
221 significant for the third wave (p-value = 0.037) and fourth wave (p-value = 0.022). The onset-  
222 to-isolation intervals of the infectors were associated with estimated serial intervals (p-value  $<$   
223 0.005) across the waves, with shorter mean onset-to-isolation intervals correlating with shorter  
224 mean serial interval estimates. Similar results were found in the sensitivity analysis for pre-  
225 defined thresholds from (5-14) days (table S6).

226

227 **Correction in estimation of transmissibility accounting for time-varying effective serial**  
228 **interval distributions**

229 We estimated time-varying  $R_t$  to infer changes in the transmissibility of COVID-19 in Hong  
230 Kong using the Wallinga-Teunis method (4) (section 5, supplementary materials) which  
231 constructed the relative likelihood for a given case being a potential infector of other cases  
232 based on the case-based reproduction number (23). We extended the method by incorporating  
233 the effective serial interval distribution into the estimation of  $R_t$  via the *EpiEstim* package in  
234 R. The estimated  $R_t$  from time-varying effective serial intervals was compared with that based  
235 on a constant serial interval distribution over the epidemic waves.

236

237 A simulation based modelling framework was also applied to quantify the bias from using a  
238 constant over time-varying serial interval in estimating  $R_t$  through a comparison of the attack  
239 rates (or cumulative number of infections) under both approaches (section 7, supplementary  
240 materials). The time series of transmission rate  $\beta_t$  derived first from the  $R_t$ , estimated based on  
241 time-varying effective serial interval distributions and possible choices of constant serial  
242 interval distributions. Then these  $\beta_t$  were used to reconstruct the respective epidemic curves  
243 by simulating Susceptible-Infected-Recovered models to assess the related bias as the  
244 difference in attack rates from the reported data.

245

246 The differences between  $R_t$  estimated from real-time effective serial intervals and a constant  
247 serial interval distribution indicated that the latter might have introduced biases in inferring the  
248 transmissibility of COVID-19 over these 3 waves under analysis (**Fig. 3**). Smaller biases in  $R_t$   
249 were identified during the fourth wave (except initial days) (**Fig. 3C**), during which effective  
250 serial interval distributions were relatively more stable (i.e., less varying) (**Fig. 1D**).

251 Furthermore, with possible choices of single constant mean ( $\mu$ ) and standard deviation ( $\sigma$ ) of  
252 serial interval distributions as estimated from our data, we predicted the bias in  $R_t$  by evaluating  
253 the mean absolute deviation from the respective  $R_t$ , calculated by using effective serial  
254 intervals. The magnitude and direction (over- or under-estimate) of these biases depends on the  
255 mean as well as the standard deviation of the fixed serial interval distributions (**Fig. 3, A to C**  
256 and fig. S6). We found biases in simulated attack rates, were smaller when generated by  
257 considering the effective serial interval distributions over the respective choices of constant  
258 serial interval distributions (**Fig. 3, D to F** and table S8).

259

## 260 **Discussion**

261 The transmission dynamics and epidemiological characteristics of COVID-19 varied  
262 significantly over time during the earlier epidemic waves studied in Hong Kong (**Fig. 1 and**  
263 **Fig. 3, A to C**), accounting for changes in case profiles and the impact of various control  
264 measures implemented at that time (table S1) (16, 17, 24) . Our results for Hong Kong align  
265 with earlier findings for mainland China, in identifying a shortening in mean serial intervals  
266 over time as an epidemic is controlled with non-pharmaceutical interventions (9, 11). The first  
267 two waves in Hong Kong were notably driven by imported cases and potential super-spreading  
268 events (17), and the proportion of asymptomatic cases was found to be significantly higher  
269 during later waves (15% - 23%). The proportion of pre-symptomatic transmissions was up to  
270 10%, and was significantly higher during the third wave, and comparable with the reported  
271 estimates elsewhere (18, 25). These inter- and intra-wave variations in case profiles along with  
272 varied PHSMs could shape the epidemiological parameters and hence the transmission  
273 dynamics of COVID-19 waves in Hong Kong.

274

275 In early 2020, we reported substantial reductions in mean effective serial intervals over time in  
276 mainland China following the implementation of various PHSMs including timely case  
277 isolation (9). Here we observed similar results in the second wave in Hong Kong (**Fig. 1B**),  
278 during which the mean onset-to-isolation delay had a positive association with mean serial  
279 interval and could explain a high proportion (59%) of variance in effective serial intervals.  
280 Other studies illustrated the effectiveness of the isolation of symptomatic cases and their  
281 potential contacts in achieving sustained control of COVID-19 transmission (26, 27). Strict  
282 isolation of cases will reduce transmission later in the infectious period (9-11). The measure of  
283 case isolation improved (i.e., early isolation) over time in Hong Kong (28) and appeared to be  
284 comparatively stable in third and fourth waves and have a lesser impact on the temporal  
285 changes in mean serial intervals (tables S3 and S4), which might have been associated with the  
286 broader application of PHSMs or demographic factors.

287

288 The community-wide PHSMs had negative association with serial interval across the waves,  
289 while case-based PHSMs, including case isolation had positive association with serial interval  
290 in the second and third wave (p-value = 0.33) (table S3). The association of these PHSMs with  
291 effective serial intervals could be positive or negative based on the impact of these  
292 interventions which could affect the infectors' infectiousness profile (as truncated or modified  
293 by case-based measures including case isolation) and effective contact pattern of infectees with  
294 potential infectors (as reduced by community-wide measures and mass testing) respectively (9-  
295 11) . This finding could suggest the lengthening of mean serial intervals during post-peak of  
296 third wave (during August 2020), when the per capita testing volume (as proxy of case-based  
297 measures) started to decline (fig. S7 and table S5), which might be attributable to missing of  
298 effective contact tracing and delays in isolation of cases (29, 30). The negative association  
299 between serial interval and community-wide PHSMs (table S3), could delay in finding

300 infectees for an infector by reducing the probability of effective contacts and resulted in reverse  
301 with the strengthening of community-wide PHSMs (30, 31).

302

303 Along with the PHSMs, we found that certain demographic characteristics of the infectors and  
304 infectees were associated with variations in serial intervals (fig. S3A and tables S7). The older  
305 cases might be more severe and had faster and higher viral load (32-39), which might have  
306 been associated with shorter latent periods and incubation periods (36, 40-46). Therefore, the  
307 serial intervals for the transmissions from older infectors to younger infectees could be the  
308 longest or vice-versa as illustrated in fig. S10. For example, we noticed from early August  
309 2021, during post-peak of third wave, the mean serial interval estimates started to be longer  
310 although the onset-to-isolation intervals were more or less stable (**Fig. 1C**). Although we  
311 noticed on an average the infectors were older than the infectees in the transmission pairs  
312 throughout the third wave and fourth waves (except during the end of fourth wave) (fig. S11).  
313 Temporal variation in the age distributions of infector and infectee for a transmission chain  
314 could reshape the serial interval (fig. S4). The mean infectors' age substantially increased after  
315 the peak of third wave (from late June and early August 2020) and during the end of the fourth  
316 wave (during February, 2021) (fig. S11), might lead longer mean serial intervals during these  
317 periods (Fig. 1).

318

319 The infectors in household settings had significantly longer serial intervals for the third wave  
320 in Hong Kong (fig. S3 and table S7), accounting the proportion of older infectors in household  
321 was higher during that wave, though mean serial intervals under such settings reported not  
322 statistically significant for the first wave in mainland China (9, 18). For example, the household  
323 transmission was increased over time as noticed during third wave (fig. S12) and having older-  
324 to-younger transmission across the course of each wave (fig. S4) might lengthen the serial

325 intervals during post-peak of third wave, during which mean onset-to-isolation were much  
326 stable (**Fig. 1C**).

327

328 Furthermore, the methods of estimation may affect the estimates of the serial interval  
329 distribution (*10*). Estimating temporal serial intervals via forward-looking, backward-looking  
330 or intrinsic approach by using a cohort-based framework have respective biases to be corrected  
331 (*10, 11, 47, 48*). Therefore, the estimation of reproduction number with single constant serial  
332 interval distribution can lead to bias (*9*) which can be minimised by using effective serial  
333 interval distributions instead (**Fig. 3**, fig. S6 and table S8). This bias was noticeably lower in  
334 fourth wave (**Fig. 3**) as by then the serial interval distribution had less variation across that  
335 period (**Fig. 1**).

336

337 This study provides a unique opportunity for a temporal investigation of how mean serial  
338 intervals can change over time, both shortening as well as lengthening depending on the  
339 intensity of transmission and the various case-based and community-wide PHSMs applied in  
340 Hong Kong, as well as variation in case profile (or characteristics), including demography,  
341 clinical severity, and transmission settings between and across waves. This is the first study to  
342 identify the potential factors, which could not only shorten the mean serial intervals over time,  
343 but also could lengthen the measure, therefore the resulting temporal changes in the estimates  
344 were accounted the direction and their strength of impacts. However, there are some limitations  
345 to our work. First, the change of the forward-looking serial intervals could be explained by  
346 both the PHSMs and internal mechanism (backward incubation period of infectors) (*11*), but  
347 detailed exposure information was not always available. Second, information on serial intervals  
348 collected through contact tracing could suffer various biases such as recall biases, which could  
349 reduce the chance of identifying longer serial intervals for example. However, our intense

350 algorithmic check and cross check with additional phylogenetic data should minimise the  
351 impact of this biases on the main outcomes. Finally, while we identified the potential for bias  
352 in  $R_t$  estimates if using constant serial interval distributions, there are other potential biases in  
353  $R_t$  estimation that we did not discuss here.

354

355 In conclusion, our results indicated that the changes in serial interval distributions might not be  
356 always monotonic as reported earlier for mainland China in 2020 (9). The real-time variations  
357 in serial interval distributions were also driven by the changes in transmission pattern (who  
358 infects whom), characterised by temporal variation in demographical and clinical profiles of  
359 the cases along with PHSMs during the first two years of the COVID-19 pandemic in Hong  
360 Kong. This time varying matrix of effective serial interval distributions could improve the  
361 estimation of transmissibility, the time varying reproduction number ( $R_t$ ) accounting for  
362 intermediate factors of transmission and allow us to assess the timely impact of public health  
363 measures.

364

365

366



## 367 References and Notes

368

- 369 1. A. J. Kucharski *et al.*, Early dynamics of transmission and control of COVID-19: a  
370 mathematical modelling study. *Lancet Infect Dis* **20**, 553-558 (2020).
- 371 2. Y. Li *et al.*, The temporal association of introducing and lifting non-pharmaceutical  
372 interventions with the time-varying reproduction number (R) of SARS-CoV-2: a  
373 modelling study across 131 countries. *Lancet Infect Dis*, (2020).
- 374 3. A. Cori, N. M. Ferguson, C. Fraser, S. Cauchemez, A new framework and software to  
375 estimate time-varying reproduction numbers during epidemics. *Am J Epidemiol* **178**,  
376 1505-1512 (2013).
- 377 4. J. Wallinga, P. Teunis, Different epidemic curves for severe acute respiratory  
378 syndrome reveal similar impacts of control measures. *Am J Epidemiol* **160**, 509-516  
379 (2004).
- 380 5. C. Fraser, Estimating individual and household reproduction numbers in an emerging  
381 epidemic. *PLoS One* **2**, e758 (2007).
- 382 6. A. Svensson, A note on generation times in epidemic models. *Math Biosci* **208**, 300-  
383 311 (2007).
- 384 7. M. Lipsitch *et al.*, Transmission dynamics and control of severe acute respiratory  
385 syndrome. *Science* **300**, 1966-1970 (2003).
- 386 8. B. J. Cowling, V. J. Fang, S. Riley, J. S. Malik Peiris, G. M. Leung, Estimation of the  
387 serial interval of influenza. *Epidemiology* **20**, 344-347 (2009).
- 388 9. S. T. Ali *et al.*, Serial interval of SARS-CoV-2 was shortened over time by  
389 nonpharmaceutical interventions. *Science* **369**, 1106-1109 (2020).
- 390 10. S. T. Ali *et al.*, Serial Intervals and Case Isolation Delays for Coronavirus Disease  
391 2019: A Systematic Review and Meta-Analysis. *Clin Infect Dis* **74**, 685-694 (2022).
- 392 11. S. W. Park *et al.*, Forward-looking serial intervals correctly link epidemic growth to  
393 reproduction numbers. *Proceedings of the National Academy of Sciences* **118**,  
394 e2011548118 (2021).
- 395 12. Centre for Health Protection (CHP) of the Department of Health, Hong Kong SAR,  
396 Latest local situation of COVID-19, (31 December 2021)  
397 [https://www.chp.gov.hk/files/pdf/local\\_situation\\_covid19\\_en.pdf](https://www.chp.gov.hk/files/pdf/local_situation_covid19_en.pdf). (2021).
- 398 13. B. Yang *et al.*, Changing Disparities in Coronavirus Disease 2019 (COVID-19)  
399 Burden in the Ethnically Homogeneous Population of Hong Kong Through Pandemic  
400 Waves: An Observational Study. *Clin Infect Dis* **73**, 2298-2305 (2021).
- 401 14. Y. M. Mefsin *et al.*, Epidemiology of Infections with SARS-CoV-2 Omicron BA.2  
402 Variant, Hong Kong, January-March 2022. *Emerg Infect Dis* **28**, (2022).
- 403 15. Hong Kong Government News for COVID-19 (31 December, 2021)  
404 <https://www.news.gov.hk/eng/categories/covid19/index.html>). (2021).
- 405 16. P. Wu *et al.*, Suppressing COVID-19 transmission in Hong Kong: an observational  
406 study of the first four months. *09 June 2020, PREPRINT (Version 1) available at*  
407 *SSRN: [https://papers.ssrn.com/sol3/papers.cfm?abstract\\_id=3627304](https://papers.ssrn.com/sol3/papers.cfm?abstract_id=3627304)*, (2020).
- 408 17. D. C. Adam *et al.*, Clustering and superspreading potential of SARS-CoV-2 infections  
409 in Hong Kong. *Nat Med* **26**, 1714-1719 (2020).
- 410 18. X. K. Xu *et al.*, Reconstruction of Transmission Pairs for novel Coronavirus Disease  
411 2019 (COVID-19) in mainland China: Estimation of Super-spreading Events, Serial  
412 Interval, and Hazard of Infection. *Clin Infect Dis*, (2020).
- 413 19. D. Klinkenberg, J. A. Backer, X. Didelot, C. Colijn, J. Wallinga, Simultaneous  
414 inference of phylogenetic and transmission trees in infectious disease outbreaks. *PLoS*  
415 *Comput Biol* **13**, e1005495 (2017).



- 416 20. K. Leung, J. T. Wu, G. M. Leung, Real-time tracking and prediction of COVID-19  
417 infection using digital proxies of population mobility and mixing. *Nat Commun* **12**,  
418 1501 (2021).
- 419 21. M. U. G. Kraemer *et al.*, The effect of human mobility and control measures on the  
420 COVID-19 epidemic in China. *Science* **368**, 493-497 (2020).
- 421 22. C. O. Buckee *et al.*, Aggregated mobility data could help fight COVID-19. *Science*  
422 **368**, 145-146 (2020).
- 423 23. K. M. Gostic *et al.*, Practical considerations for measuring the effective reproductive  
424 number, Rt. *PLoS Comput Biol* **16**, e1008409 (2020).
- 425 24. B. J. Cowling *et al.*, Impact assessment of non-pharmaceutical interventions against  
426 coronavirus disease 2019 and influenza in Hong Kong: an observational study. *Lancet*  
427 *Public Health* **5**, e279-e288 (2020).
- 428 25. Z. Du *et al.*, Serial Interval of COVID-19 among Publicly Reported Confirmed Cases.  
429 *Emerg Infect Dis* **26**, 1341-1343 (2020).
- 430 26. Y. Ng *et al.*, Evaluation of the Effectiveness of Surveillance and Containment  
431 Measures for the First 100 Patients with COVID-19 in Singapore - January 2-  
432 February 29, 2020. *MMWR Morb Mortal Wkly Rep* **69**, 307-311 (2020).
- 433 27. A. J. Kucharski *et al.*, Effectiveness of isolation, testing, contact tracing, and physical  
434 distancing on reducing transmission of SARS-CoV-2 in different settings: a  
435 mathematical modelling study. *Lancet Infect Dis* **20**, 1151-1160 (2020).
- 436 28. H. Y. Lam *et al.*, The epidemiology of COVID-19 cases and the successful  
437 containment strategy in Hong Kong-January to May 2020. *Int J Infect Dis* **98**, 51-58  
438 (2020).
- 439 29. B. Yang *et al.*, Universal community nucleic acid testing for COVID-19 in Hong  
440 Kong reveals insights into transmission dynamics: a cross-sectional and modelling  
441 study. *Clin Infect Dis*, (2021).
- 442 30. H. Y. Yuan, C. Blakemore, The impact of multiple non-pharmaceutical interventions  
443 on controlling COVID-19 outbreak without lockdown in Hong Kong: A modelling  
444 study. *Lancet Reg Health West Pac* **20**, 100343 (2022).
- 445 31. K. Leung, J. T. Wu, G. M. Leung, Effects of adjusting public health, travel, and social  
446 measures during the roll-out of COVID-19 vaccination: a modelling study. *Lancet*  
447 *Public Health* **6**, e674-e682 (2021).
- 448 32. F. Shi *et al.*, Association of viral load with serum biomarkers among COVID-19 cases.  
449 *Virology* **546**, 122-126 (2020).
- 450 33. F. X. Lescure *et al.*, Clinical and virological data of the first cases of COVID-19 in  
451 Europe: a case series. *Lancet Infect Dis* **20**, 697-706 (2020).
- 452 34. Y. Liu *et al.*, Viral dynamics in mild and severe cases of COVID-19. *Lancet Infect*  
453 *Dis* **20**, 656-657 (2020).
- 454 35. Y. Pan, D. Zhang, P. Yang, L. L. M. Poon, Q. Wang, Viral load of SARS-CoV-2 in  
455 clinical samples. *Lancet Infect Dis* **20**, 411-412 (2020).
- 456 36. K. A. Walsh *et al.*, SARS-CoV-2 detection, viral load and infectivity over the course  
457 of an infection. *J Infect* **81**, 357-371 (2020).
- 458 37. Y. D. Gao *et al.*, Risk factors for severe and critically ill COVID-19 patients: A  
459 review. *Allergy* **76**, 428-455 (2021).
- 460 38. K. K. To *et al.*, Temporal profiles of viral load in posterior oropharyngeal saliva  
461 samples and serum antibody responses during infection by SARS-CoV-2: an  
462 observational cohort study. *Lancet Infect Dis* **20**, 565-574 (2020).
- 463 39. E. Pujadas *et al.*, SARS-CoV-2 viral load predicts COVID-19 mortality. *Lancet*  
464 *Respir Med* **8**, e70 (2020).

- 465 40. T. Ward, A. Johnsen, Understanding an evolving pandemic: An analysis of the  
466 clinical time delay distributions of COVID-19 in the United Kingdom. *PLoS One* **16**,  
467 e0257978 (2021).
- 468 41. M. Levine-Tiefenbrun *et al.*, Initial report of decreased SARS-CoV-2 viral load after  
469 inoculation with the BNT162b2 vaccine. *Nat Med* **27**, 790-792 (2021).
- 470 42. H. Xin *et al.*, The incubation period distribution of coronavirus disease 2019  
471 (COVID-19): a systematic review and meta-analysis. *Clin Infect Dis*, (2021).
- 472 43. C. Leung, The difference in the incubation period of 2019 novel coronavirus (SARS-  
473 CoV-2) infection between travelers to Hubei and nontravelers: The need for a longer  
474 quarantine period. *Infect Control Hosp Epidemiol* **41**, 594-596 (2020).
- 475 44. X. He *et al.*, Temporal dynamics in viral shedding and transmissibility of COVID-19.  
476 *Nat Med* **26**, 672-675 (2020).
- 477 45. M. Levine-Tiefenbrun *et al.*, SARS-CoV-2 RT-qPCR Test Detection Rates Are  
478 Associated with Patient Age, Sex, and Time since Diagnosis. *J Mol Diagn*, (2021).
- 479 46. T. C. Jones *et al.*, Estimating infectiousness throughout SARS-CoV-2 infection  
480 course. *Science* **373**, (2021).
- 481 47. D. Champredon, J. Dushoff, Intrinsic and realized generation intervals in infectious-  
482 disease transmission. *Proc Biol Sci* **282**, 20152026 (2015).
- 483 48. S. W. Park, D. Champredon, J. S. Weitz, J. Dushoff, A practical generation-interval-  
484 based approach to inferring the strength of epidemics from their speed. *Epidemics* **27**,  
485 12-18 (2019).
- 486 49. X. F. Liu, X. K. Xu, Y. Wu, Mobility, exposure, and epidemiological timelines of  
487 COVID-19 infections in China outside Hubei province. *Sci Data* **8**, 54 (2021).
- 488 50. S. T. Ali *et al.*, Serial intervals and case isolation delays for COVID-19: a systematic  
489 review and meta-analysis. *Clin Infect Dis*, ciab491 (2021).
- 490 51. J. T. Wu *et al.*, Nowcasting epidemics of novel pathogens: lessons from COVID-19.  
491 *Nat Med* **27**, 388-395 (2021).
- 492 52. R. Subramanian, Q. He, M. Pascual, Quantifying asymptomatic infection and  
493 transmission of COVID-19 in New York City using observed cases, serology, and  
494 testing capacity. *Proc Natl Acad Sci U S A* **118**, (2021).
- 495 53. S. T. Ali, B. J. Cowling, E. H. Y. Lau, V. J. Fang, G. M. Leung, Mitigation of  
496 Influenza B Epidemic with School Closures, Hong Kong, 2018. *Emerg Infect Dis* **24**,  
497 2071-2073 (2018).
- 498 54. S. T. Ali *et al.*, Prediction of Upcoming Global Infection Burden of Influenza Seasons  
499 after Relaxation of Public Health and Social Measures for COVID-19 Pandemic.  
500 Available at SSRN: <https://ssrn.com/abstract=4063811> or  
501 <http://dx.doi.org/10.2139/ssrn.4063811>, (2022).
- 502 55. L. Sigfrid *et al.*, What is the recovery rate and risk of long-term consequences  
503 following a diagnosis of COVID-19? A harmonised, global longitudinal observational  
504 study protocol. *BMJ Open* **11**, e043887 (2021).
- 505

506

507

508 **Acknowledgments:**

509 We acknowledge Ms. Julie Au for technical assistance. We thank the Centre for Health  
510 Protection in Hong Kong for their data collection and compilation throughout the COVID-19  
511 pandemic. We thank Kathy Leung for helpful discussions. STA, DC, and acknowledge the  
512 research computing facilities and advisory services offered by Information Technology  
513 Services, The University of Hong Kong.

514

515 **Funding:**

516 Health and Medical Research Fund, Health Bureau, Government of the Hong Kong Special  
517 Administrative Region grant COVID190118 (BJC) and grant 20190712 (STA);  
518 Collaborative Research Scheme grant C7123-20G and grant T11-705/14N, Research Grants  
519 Council, Government of the Hong Kong Special Administrative Region (BJC);  
520 AIR@innoHK program of the Innovation and Technology Commission, Government of the  
521 Hong Kong Special Administrative Region (STA, ZD, EHYL, PW, GML, BJC);  
522 European Research Council (grant no. 804744); the Grand Challenges ICODA pilot initiative,  
523 delivered by Health Data Research UK and funded by the Bill & Melinda Gates Foundation  
524 and the Minderoo Foundation (LW);  
525 The funding bodies had no role in study design, data collection and analysis, preparation of the  
526 manuscript, or the decision to publish.

527

528 **Author contributions:**

529 Conceptualization: STA, PW, BJC  
530 Methodology: STA, DC, LW, EHYL, BJC  
531 Investigation: STA, DC, WWL, AY, DCA, YCL  
532 Data: WWL, AY, DC, DCA, JX, FH, HG, STA  
533 Visualization: DC, AY, YCL, STA  
534 Comments: DCA, EHYL, LW, ZD, JYW, XKX, PW, GML, BJC  
535 Funding acquisition: STA, EHYL, ZD, LW, PW, GML, BJC  
536 Project administration: STA, DC, WWL, DCA, YCL  
537 Supervision: GML, BJC

538 Writing – original draft: STA, DC, BJC

539 Writing – review & editing: STA, DCA, EHYL, LW, ZD, JYW, XKX, PW, GML, BJC

540

541 **Competing interests:**

542 BJC consults for AstraZeneca, Fosun Pharma, GSK, Moderna, Pfizer, Roche and Sanofi  
543 Pasteur. The authors report no other potential conflicts of interest.

544

545 **Data and materials availability:**

546 All data, code, and materials used in the analyses in main text and supplementary materials

547 will be available together with the publication of this paper.

548

549 **Supplementary Materials**

550 Materials and Methods

551 Supplementary Text

552 Figs. S1 to S12

553 Tables S1 to S8

554 References (49–55)

555

556

557

558

559

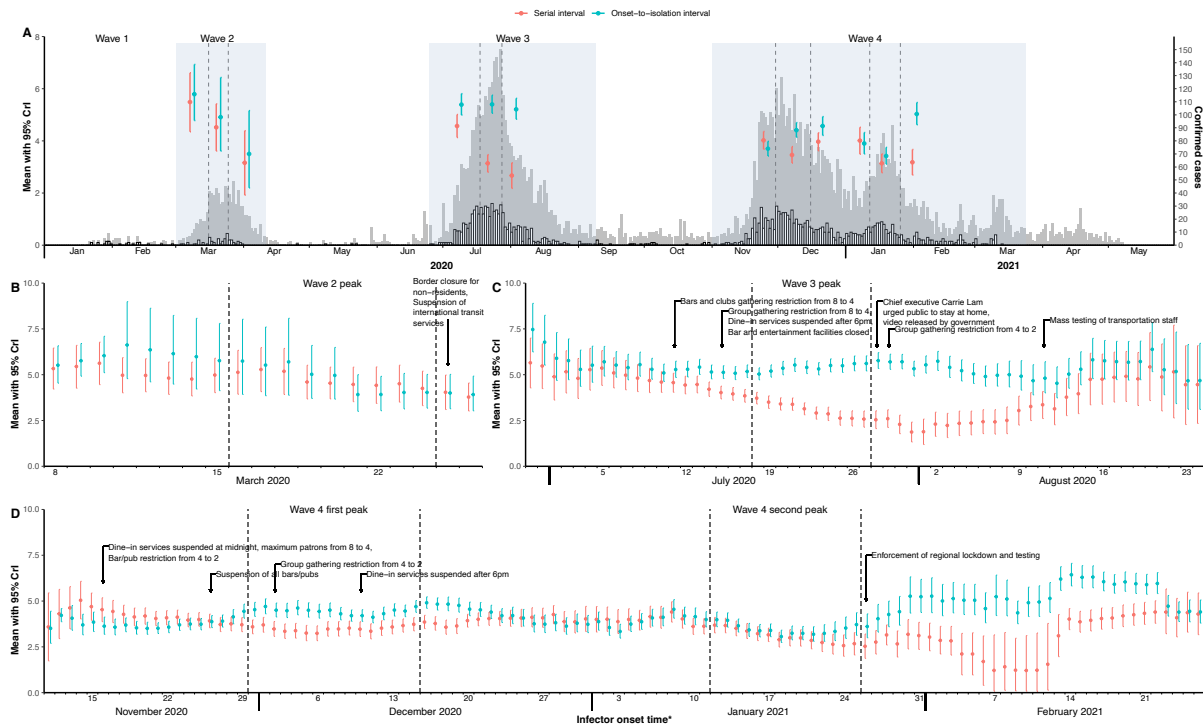

560

561 **Fig. 1. Transmission dynamics and temporal estimates of serial interval distribution and**  
 562 **isolation delay for COVID-19 in Hong Kong.** (A) The grey bars indicate the epi-curve of the  
 563 reported COVID-19 cases, and white bars are onset epi-curves for infectors of those reported  
 564 cases during four waves in Hong Kong. Mean serial interval estimates (red dots) with 95% CrI  
 565 (red vertical line segments) and mean onset-to-isolation interval (teal dots) with 95% CrI  
 566 (teal vertical line segments), evaluated from all confirmed and likely transmission pairs during pre-  
 567 peak, peak-timing, and post-peaks for three pre-defined waves (light blue shades) with vertical  
 568 dark grey dashed lines referring to the peak-timing for each wave, with two peaks for fourth  
 569 wave. (B)-(D) Time varying estimates of effective serial intervals and onset-to-isolation  
 570 interval for second wave (A), third wave (B) and fourth wave (C) with the indicator to timings  
 571 of major public health and social measures (PHSMs) implemented in Hong Kong. The area  
 572 between two grey dashed lines in each wave indicates the peak timing of the epidemic wave.  
 573 The estimates of serial interval and onset-to-isolation interval are evaluated by using MCMC  
 574 on fitting normal and gamma distributions to empirical data on confirmed and likely  
 575 transmission pairs (considering predefined threshold of 8 days) respectively. The effective  
 576 serial intervals and onset-to-isolation intervals are estimated based on the empirical data in 10-  
 577 day sliding windows (presented with respect to the 5<sup>th</sup> day of each sliding window).

578

579

580

581

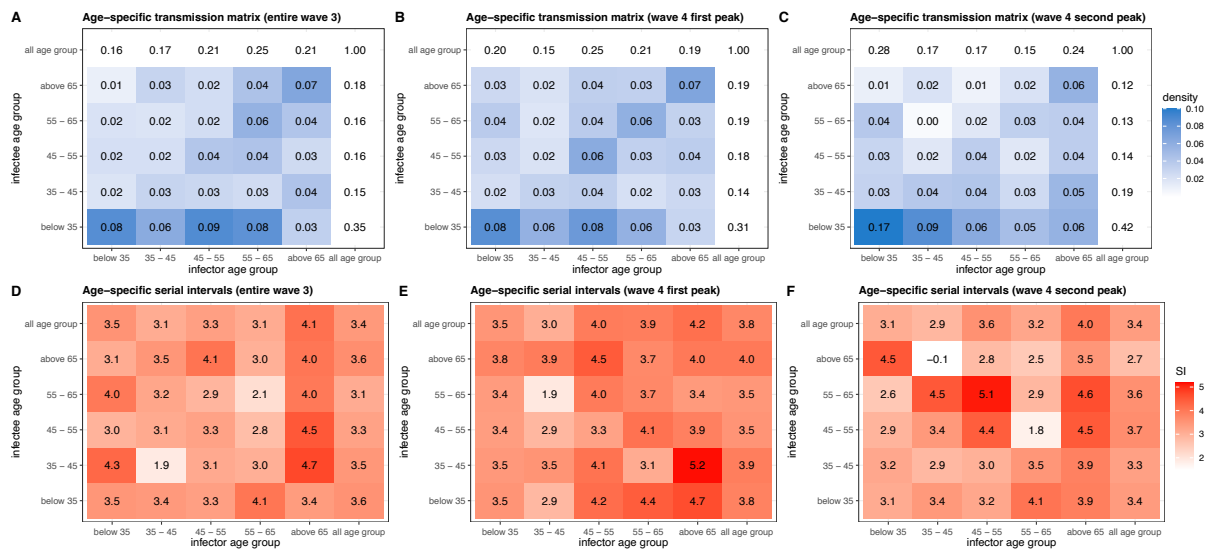

582

583 **Fig. 2. Age-specific transmission and serial interval estimated between infectors and**  
 584 **infectees for COVID-19 in Hong Kong.** The heat maps for age-specific transmission densities  
 585 (the relative frequency matrices of the age distribution of infector-infectee transmission pairs  
 586 for the age-groups of below 35, 35-45, 45-55, 55-65, above 65 years) with the marginal  
 587 densities were for third wave (A), 1<sup>st</sup> peak of fourth wave (B) and 2<sup>nd</sup> peak of fourth wave (C)  
 588 of COVID-19 in Hong Kong. Age-specific empirical mean serial intervals with the respective  
 589 marginal estimates, evaluated for these age-groups stratifications for infector and infectee  
 590 across the third wave (D), 1<sup>st</sup> peak of fourth waves (E) and 2<sup>nd</sup> peak of fourth wave (F). Note  
 591 that no infector found of age 65 years and over during second wave, hence excluded for age-  
 592 specific analysis.

593

594

595

596

597

598

599

600

601

602

603

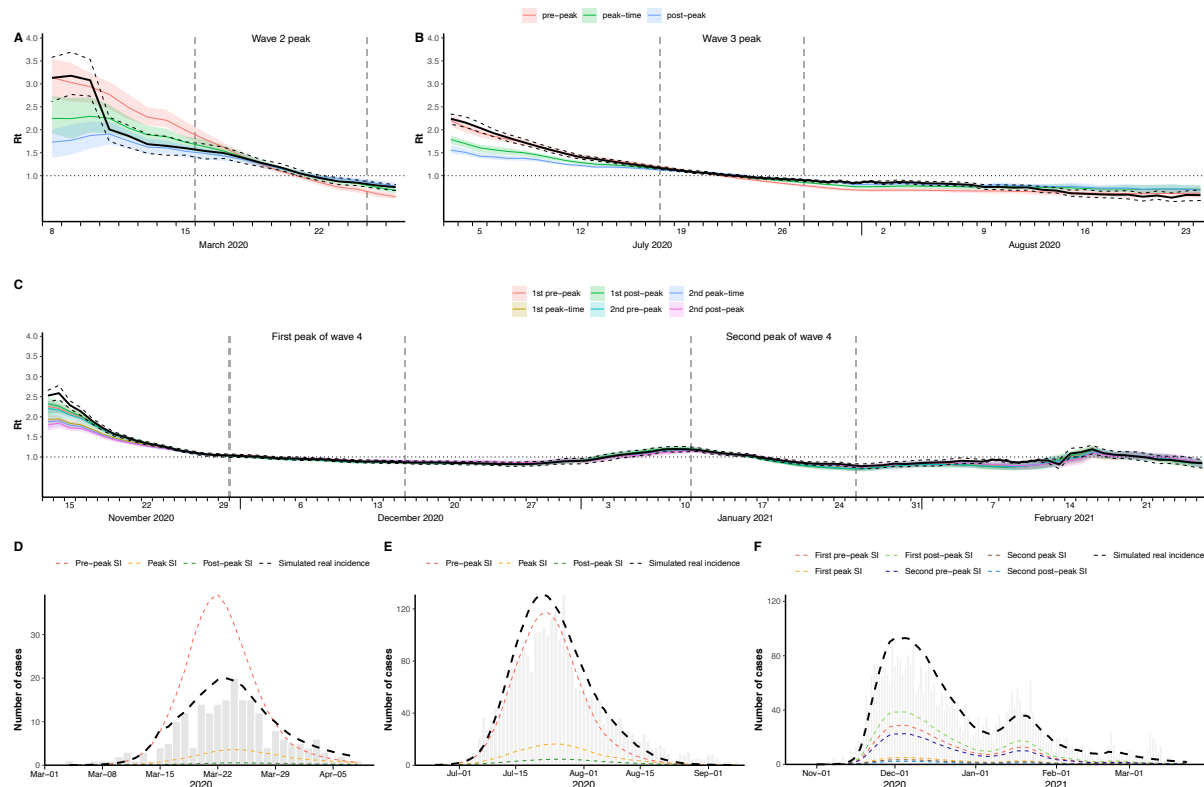

604  
 605 **Fig. 3. Correction in transmissibility for the bias from using constant serial interval over**  
 606 **effective serial interval distributions.** Comparison of daily estimates of effective  
 607 reproduction numbers ( $R_t$ ) by using real-time effective serial interval distributions versus using  
 608 a single fixed serial interval distributions for second wave (A), third wave (B) and fourth wave  
 609 (C) in Hong Kong. The black solid lines are mean  $R_t$  (with 95% CI in dashed black lines),  
 610 evaluated using effective serial interval distributions and other solid colours lines represent the  
 611 mean  $R_t$  (with 95% CI in respective colours shades), evaluated using single fixed serial interval  
 612 distributions. The fixed serial interval distributions with means (standard deviations) were  
 613 considered for pre-, during and post-peak respectively in each wave as mean 5.5 (2.4) days, 4.5  
 614 (3.2) days and 3.2 (2.5) days for second wave; 4.6 (3.9) days, 3.1 (3.2) days and 2.7 (4.3) days  
 615 for third wave; 4.0 (2.8) days, 3.5 (3.1) days and 4.0 (2.4) days for 1<sup>st</sup> peak of fourth wave; and  
 616 4.0 (3.0) days, 3.1 (2.7) days and 3.2 (3.3) days for 2<sup>nd</sup> peak of fourth wave. The differences  
 617 between the black solid lines and the coloured solid lines indicate the respective biases on using  
 618 single constant serial interval distribution to estimate  $R_t$ . (D)-(E) The biases in terms of attack  
 619 rates, estimated by reconstructing the epi-curves via. using the transmissibility ( $R_t$ ) derived by  
 620 effective and constants serial interval distributions and Susceptible-Infected-Recovered (SIR)  
 621 models for second wave (A), third wave (B) and fourth wave (C) in Hong Kong. The observed  
 622 epi-curves (in grey bars) of the COVID-19 cases, the reconstructed epi-curves in dashed lines  
 623 by using effective serial interval distributions (in black dashed lines) and different  
 624 counterfactual constant serial interval distributions (in dashed coloured lines). The differences  
 625 between the black dashed lines and the coloured dashed lines indicate the respective biases in  
 626 attack rates on using constant serial interval distributions.

627  
 628
